# Supplementary material for: Designing an efficient multi-epitope oral vaccine against Helicobacter pylori using immunoinformatics and structural vaccinology approaches
Source: Royal Society of Chemistry journal article supplement (doi:10.1039/c6mb00772d), 2017-02-03
Supplement: c6mb00772d1.pdf [file c6mb00772d1.pdf]

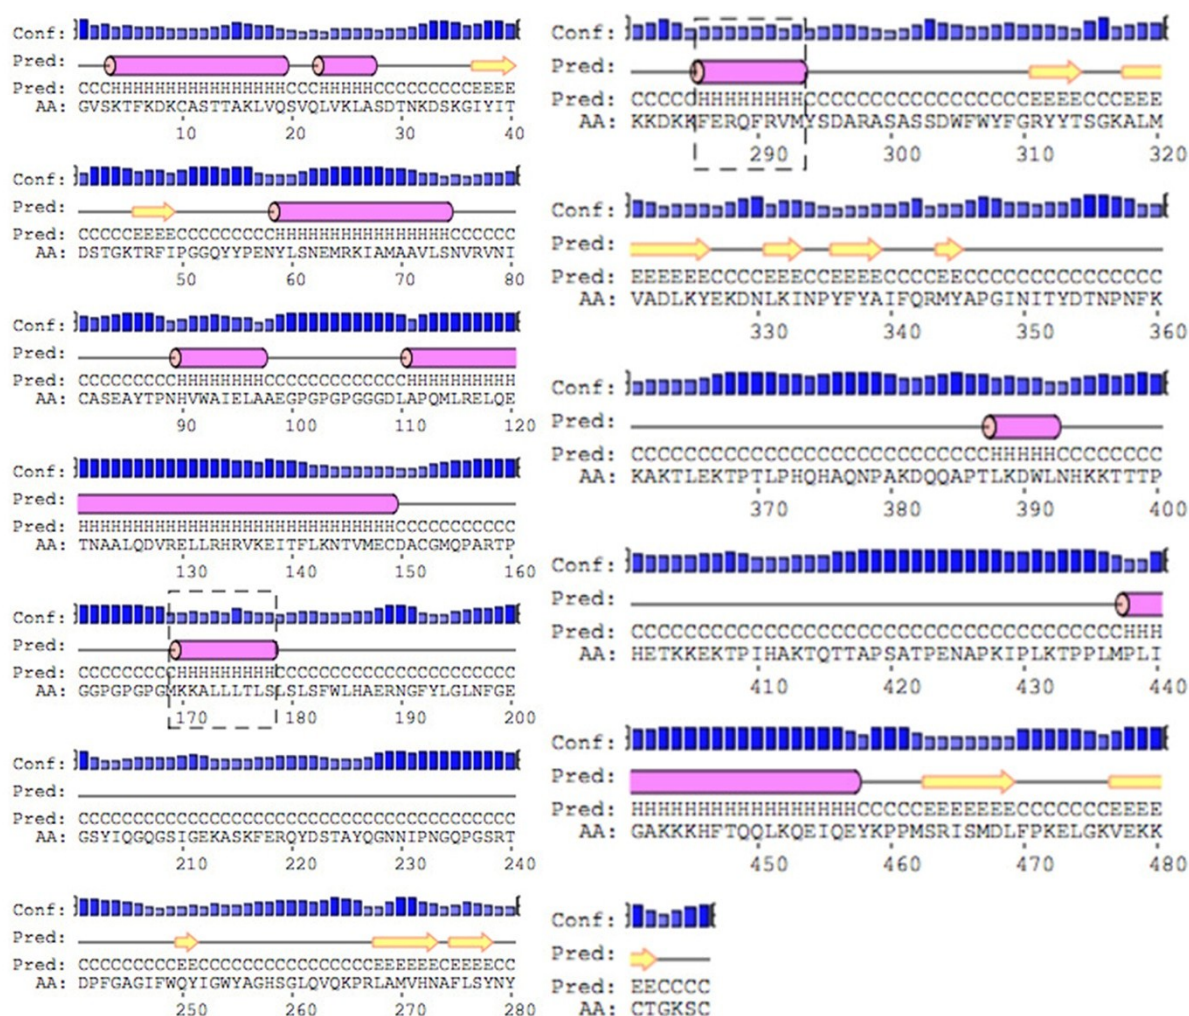

**Figure S1:** Graphical representation of secondary structure of protein vaccine was obtained from PSIPRED server. The blue bars show confidence of prediction. The two  $\alpha$ -helix regions that were imposed to 3D structure of vaccine are shown in the dashed box (residues 170-178 and 286-293).

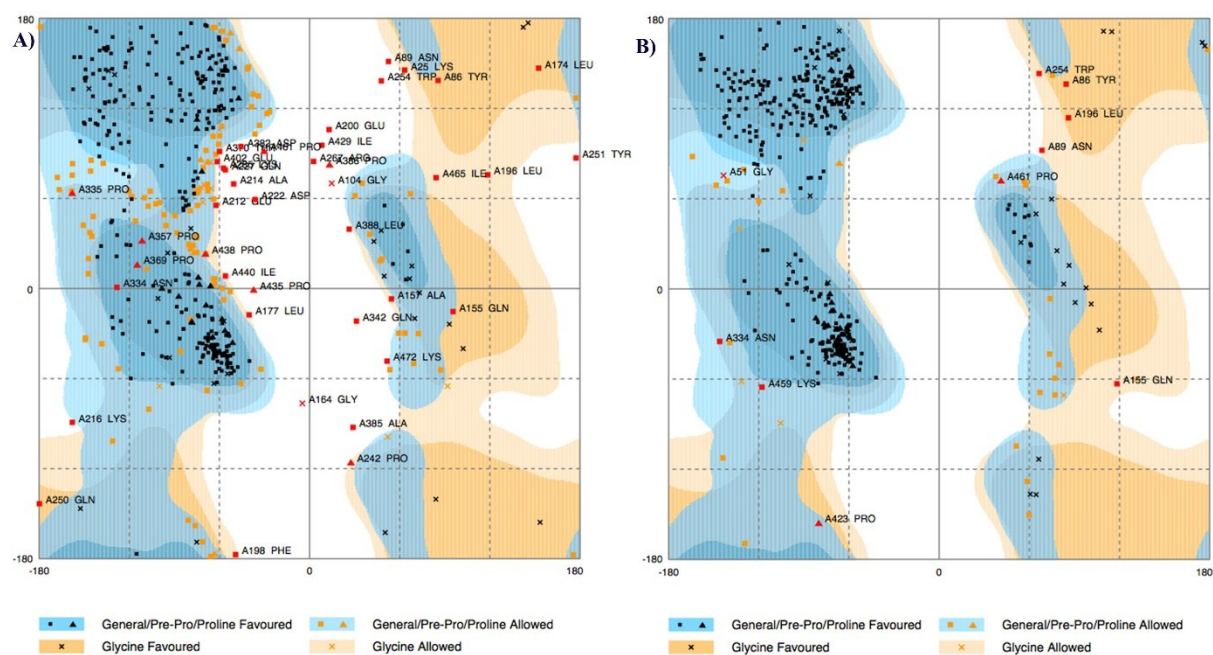

**Figure S2:** Validation of the initial and refined 3D model of protein vaccine. A) In the initial model 328 (67.8%), 115(23.8%) and 41 (8.5%) of residues are located in favored, allowed and outlier regions, respectively. B) In the refined model, 444 (91.7%), 30 (6.2%) and only 10 (2.1%) of residues are located in favored, allowed and outlier regions, respectively.

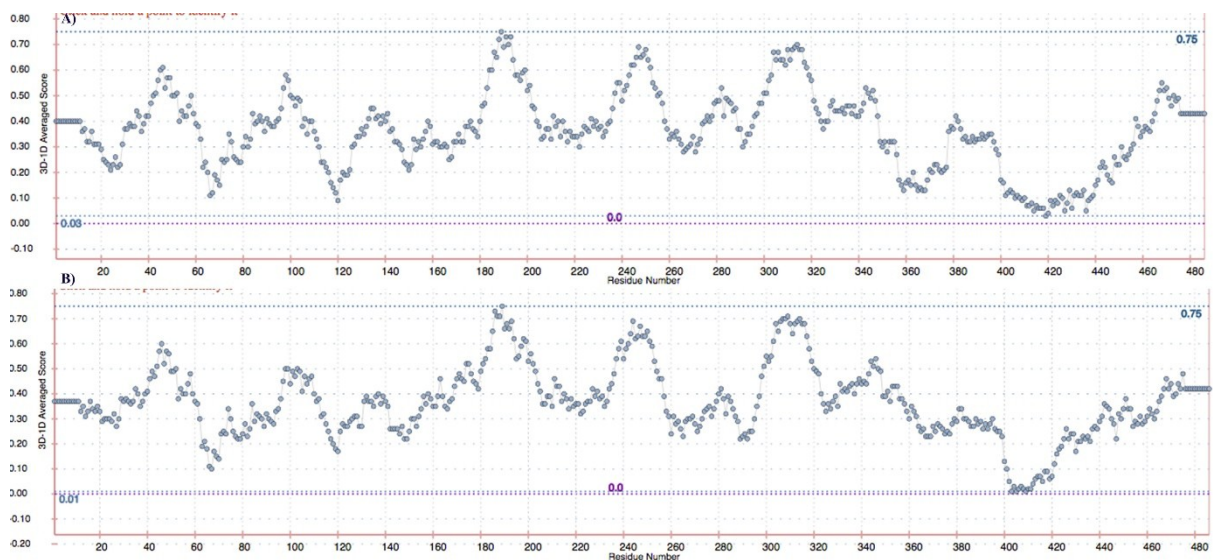

**Figure S3:** Verify 3D evaluation of the initial and refined 3D model of protein vaccine. A) In the initial model 85.80% of the residues had an average 3D-1D score  $\geq 0.2$ . B) In the refined model 92.8% of the residues had an average 3D-1D score  $\geq 0.2$ .

Z-Score: **-9.05**

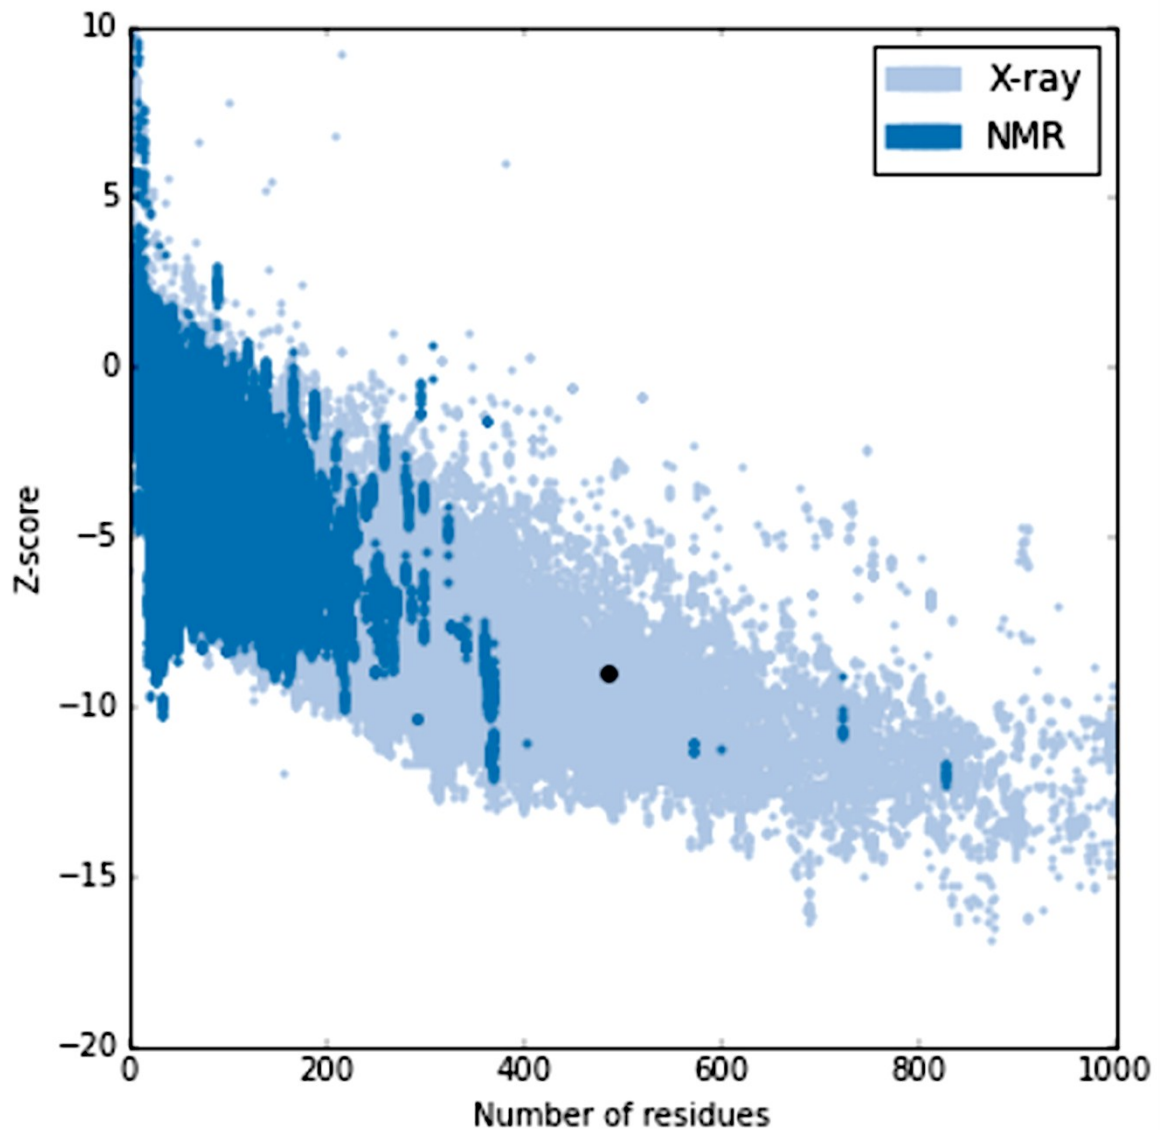

**Figure S4:** The ProSA *z*-score represents overall quality of protein vaccine. The *z*-score of primary model was not defined due to low quality, but the *z*-score of refined model is -9.05 (in the plot), which shows our structure is within the range of scores typically found for native proteins of similar size. The *z*-score of refined model is delineated in large black spot. The *z*-Score plot consists of *z*-scores of all experimentally protein chains in PDB determined by NMR spectroscopy (dark blue) and X-ray crystallography (light blue).

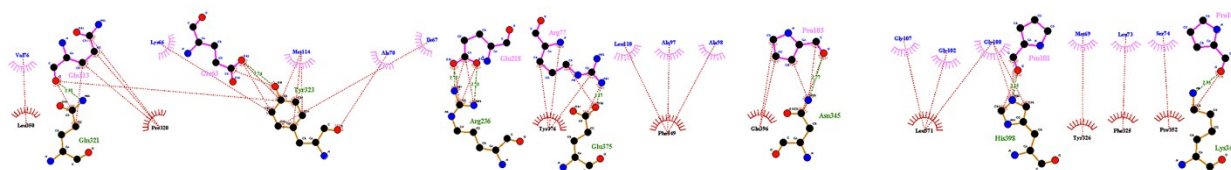

**Figure S5:** LigPlot<sup>+</sup>2D depiction of intermolecular interactions between the protein vaccine (LT-IIc) and TLR2. Binding of LT-IIc to TLR2 is mostly mediated by hydrophobic interactions and a possible hydrogen bond between residues Q321, Y323, R236, E375, N345, H398, and K347 of TLR2 (green) and residues Q113, E63, E218, R77, P103, P101 and P105 of LT-IIc (blue). The projected hydrophobic interactions include L350, P320, Y323, R236, Y376, E375, F349, Q396, N345, L371, H398, Y326, F325, P352 and K347 of TLR2 and residues V76, Q113, K66, E63, M114, A70, I67, E218, R77, L110, A97, A98, P103, G107, G102, G100, P101, M69, L73, S74 and P105 of LT-IIc.

#### Key

----- = Hydrogen bond and its length

----- = Hydrophobic interactions

●● Ligand bond  
●● Non-ligand bond

His 53 Non-ligand residues involved in hydrophobic contact(s)  
● Corresponding atoms involved in hydrophobic contact(s)

**Table S1:** The high-scored peptide regions over MHC-II alleles correspond to HP0487 and HP0906 antigens, were selected according to results of MHCpreds, IEDB and RANKPEP.

| Servers  | Antigens |        | Best ranked epitope in the region                  |
|----------|----------|--------|----------------------------------------------------|
| MHCpreds | Start aa | End aa | Predicted IC <sub>50</sub> value (nM) <sup>a</sup> |
|          | HP0487   |        |                                                    |
|          | 23       | 41     | 6.14                                               |
|          | 74       | 118    | 6.11                                               |
|          | 201      | 265    | 6.10                                               |
|          | 366      | 419    | 6.11                                               |
|          | 438      | 471    | 6.11                                               |
|          | HP0906   |        |                                                    |
|          | 4        | 42     | 5.88                                               |
|          | 77       | 116    | 5.9                                                |
|          | 160      | 208    | 6.1                                                |
|          | 299      | 333    | 6.11                                               |
|          | 365      | 442    | 5.89                                               |
|          | 493      | 525    | 6.12                                               |
| IEDB     |          |        | Percentile rank <sup>b</sup>                       |
|          | HP0487   |        |                                                    |
|          | 33       | 48     | 3.74                                               |
|          | 89       | 113    | 0.25                                               |
|          | 141      | 173    | 2.52                                               |
|          | 193      | 241    | 0.52                                               |
|          | 283      | 328    | 0.58                                               |
|          | 387      | 401    | 16.89                                              |
|          | HP0906   |        |                                                    |
|          | 2        | 21     | 3.11                                               |
|          | 96       | 115    | 16.3                                               |
|          | 215      | 232    | 3.27                                               |
|          | 274      | 343    | 2.35                                               |
|          | 400      | 423    | 1.1                                                |
|          | 513      | 527    | 3.16                                               |
| RANKPEP  |          |        | Score <sup>c</sup>                                 |
|          | HP0487   |        |                                                    |
|          | 22       | 70     | 11.84                                              |
|          | 95       | 171    | 19.36                                              |
|          | 221      | 274    | 19.36                                              |
|          | 286      | 314    | 13.29                                              |
|          | 393      | 435    | 20.24                                              |
|          | HP0906   |        |                                                    |
|          | 3        | 35     | 11.94                                              |
|          | 78       | 125    | 20.35                                              |
|          | 156      | 184    | 13.37                                              |

|  |     |     |       |
|--|-----|-----|-------|
|  | 289 | 346 | 22.40 |
|  | 392 | 415 | 21.75 |
|  | 498 | 527 | 17.24 |

<sup>a</sup> Low predicted IC<sub>50</sub> value=good binder.

| Servers  | Antigens |        | Best ranked epitope in the region |
|----------|----------|--------|-----------------------------------|
| Bcpreds* | Start aa | End aa | Score <sup>a</sup>                |
|          | HP0487   |        |                                   |
|          | 60       | 80     | 0.76                              |
|          | 113      | 133    | 1                                 |
|          | 178      | 198    | 0.96                              |
|          | 207      | 227    | 0.99                              |
|          | 260      | 280    | 0.99                              |
|          | 294      | 314    | 0.93                              |
|          | 336      | 356    | 0.99                              |
|          | 389      | 409    | 0.92                              |
|          | 440      | 460    | 1                                 |
|          | HP0906   |        |                                   |
|          | 2        | 20     | 0.97                              |
|          | 22       | 42     | 0.98                              |
|          | 46       | 87     | 0.99                              |
|          | 95       | 115    | 0.97                              |
|          | 124      | 187    | 1                                 |
|          | 226      | 246    | 0.89                              |
|          | 263      | 374    | 1                                 |
|          | 393      | 413    | 0.94                              |
|          | 478      | 498    | 0.99                              |
|          | 505      | 525    | 0.98                              |
| ABCpred* |          |        | Score <sup>a</sup>                |
|          | HP0487   |        |                                   |
|          | 10       | 30     | 0.85                              |
|          | 46       | 110    | 0.88                              |
|          | 133      | 153    | 0.85                              |
|          | 185      | 224    | 0.9                               |
|          | 264      | 284    | 0.81                              |
|          | 338      | 358    | 0.89                              |
|          | 385      | 405    | 0.88                              |
|          | 446      | 466    | 0.89                              |
|          | HP0906   |        |                                   |
|          | 13       | 52     | 0.8                               |
|          | 94       | 114    | 0.92                              |



|          |        |     |                    |
|----------|--------|-----|--------------------|
|          | 139    | 156 | 0.79               |
|          | 270    | 290 | 0.8                |
|          | 361    | 399 | 0.86               |
|          | 407    | 454 | 0.91               |
|          | 495    | 528 | 0.87               |
| BepiPred |        |     | Score <sup>a</sup> |
|          | HP0487 |     |                    |
|          | 63     | 77  | 1.43               |
|          | 107    | 130 | 2.47               |
|          | 176    | 187 | 1.41               |
|          | 213    | 218 | 1.35               |
|          | 266    | 277 | 1.44               |
|          | 295    | 299 | 1.2                |
|          | 333    | 352 | 1.04               |
|          | 396    | 404 | 1.89               |
|          | HP0906 |     |                    |
|          | 2      | 38  | 1.91               |
|          | 54     | 102 | 2.17               |
|          | 130    | 188 | 2.39               |
|          | 258    | 277 | 1.89               |
|          | 315    | 325 | 2.25               |
|          | 336    | 392 | 2.66               |
|          | 403    | 411 | 1.17               |
|          | 486    | 500 | 2.52               |
|          | 505    | 520 | 2.06               |

<sup>b</sup> Low percentile=good binder.

<sup>c</sup> High score=good binder.

**Table S2:** The high-scored peptide regions of HP0487 and HP0906 antigens, were selected by Bcpreds, ABCpred and BepiPred servers as linear B-cell epitopes.

<sup>a</sup> Higher score= higher probability to be as linear B-cell epitope

\*In Bcpreds and ABCpred the highest score for epitopes=1
